# Supplementary material
Source: Springer Nature journal article supplement (https://www.springermedizin.de/resource/supplementary/12889_2007_1116_MOESM2_ESM.pdf/9502488)
Supplement: MOESM2 [file 9502488]

## Population

Sanitary signal

Geographical situation  
Engagement conditions  
Mobility  
Turnover of people  
Multinationality  
Defence secret  
Medical secret

### Evaluation parameters

Portability  
Adaptability  
Flexibility  
Stability  
Interoperability  
Security

## Recording network

Recording

Actors  
Hardware  
Software

Notification

Adapted communication tools

### Evaluation parameters

Acceptability  
Ergonomics  
Permanence  
Security

Knowledge of  
health situation and  
its evolution

## Analysis network

### Evaluation parameters

Timeliness  
Validity  
Quality of data

Collection

Hardware  
Software

Validation

Communication  
Software  
Investigation

Analysis

Methods  
Statistics

GIS  
Automatization

Feedback for  
actors

Results

Synthesis for  
commanders

Dashboards

## Commanders

### Evaluation parameters

Usefulness  
Costs/benefits

Type  
Quantity  
Duration

Medical  
counter-measures

Command of  
operations

Information system
